# Supplementary material
Source: PubMed Central journal article supplement (PMC3271733)

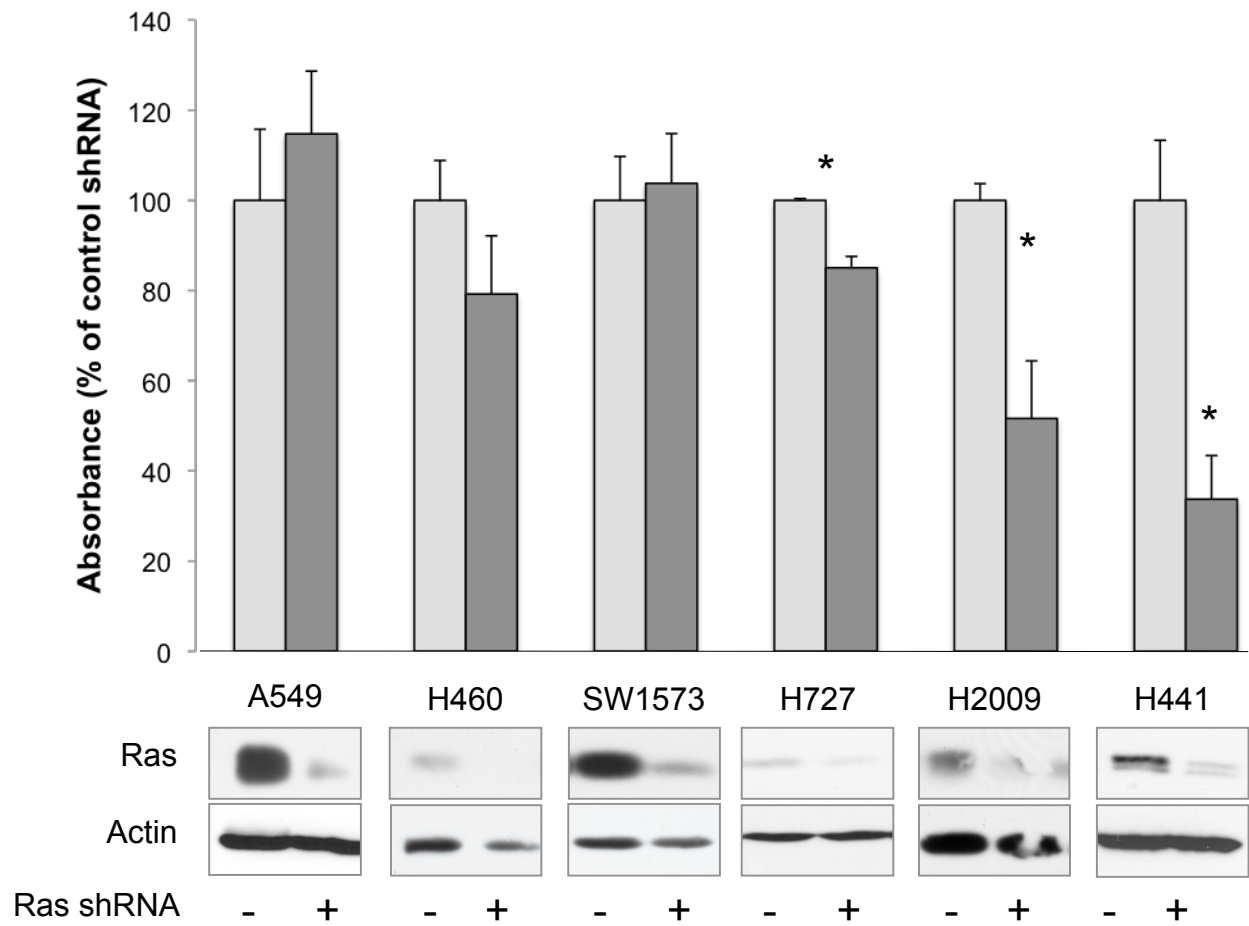

Supplemental Fig 1

Supplement: NIHMS351986-supplement-Figure_1.pdf [file NIHMS351986-supplement-Figure_1.pdf]

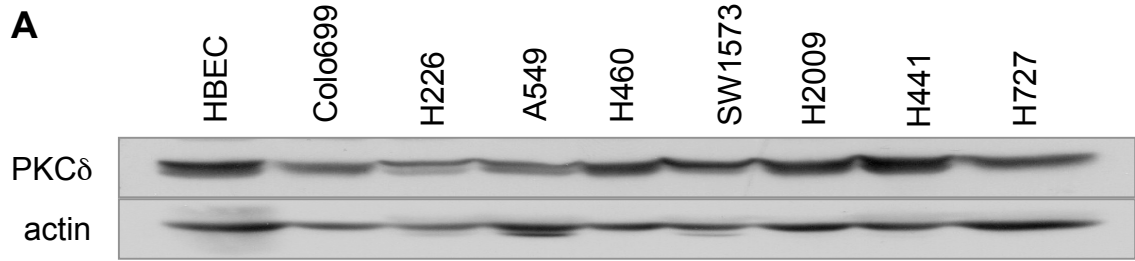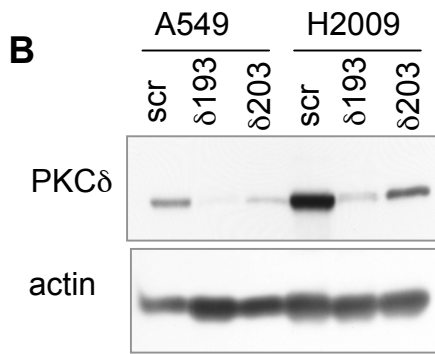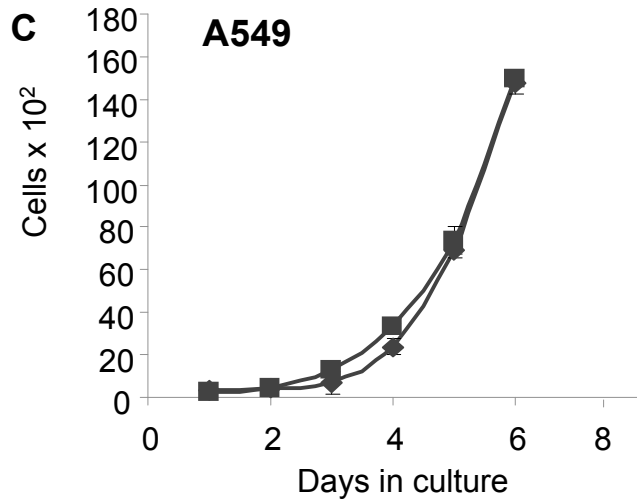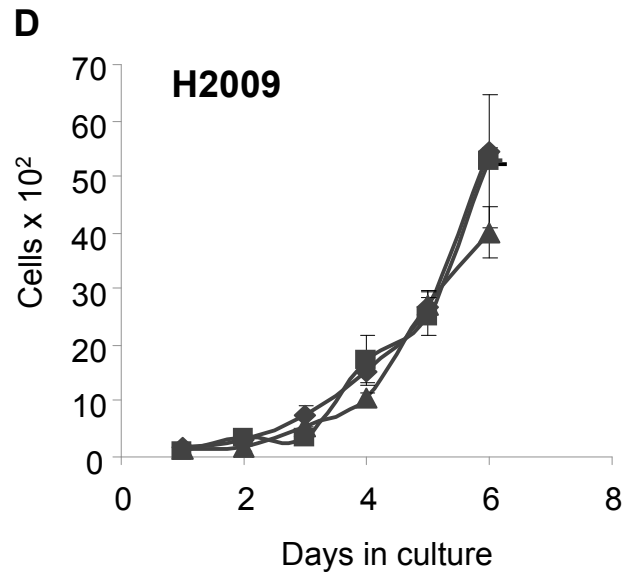

Supplementary Figure 2 A, B, C

Supplement: NIHMS351986-supplement-Figure_2.pdf [file NIHMS351986-supplement-Figure_2.pdf]
